# Supplementary material
Source: PubMed Central journal article supplement (PMC4533088)
Supplement: Supp_Fig1.pdf [file Supp_Fig1.pdf]

## Supplementary Data

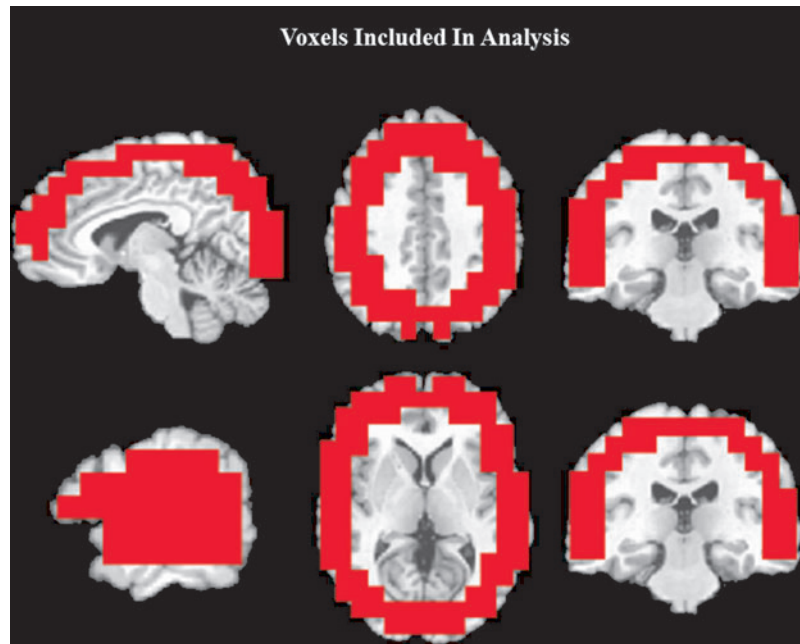

**SUPPLEMENTARY FIG. S1.** A visualization of voxels included in the analysis. Voxels that were expected to have poor signal-to-noise ratios and/or poor sensor coverage were removed.
