# Supplementary material
Source: PubMed Central journal article supplement (PMC4533088)
Supplement: Supp_Fig3.pdf [file Supp_Fig3.pdf]

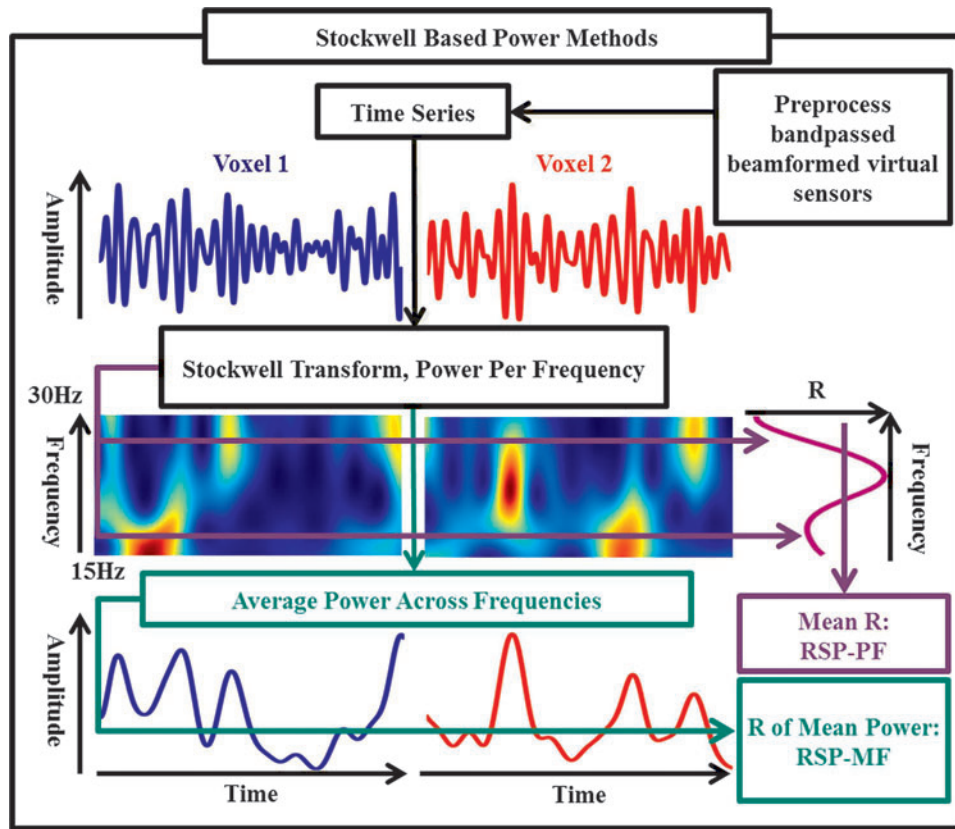

**SUPPLEMENTARY FIG. S3.** Stockwell-based power methods. RSP-PF calculates R values at each individual resolved frequency, and then averages them. RSP-MF calculates the R of mean power across the band of interest (here 15–30 Hz).
