# Supplementary material
Source: PubMed Central journal article supplement (PMC4533088)
Supplement: Supp_Fig4.pdf [file Supp_Fig4.pdf]

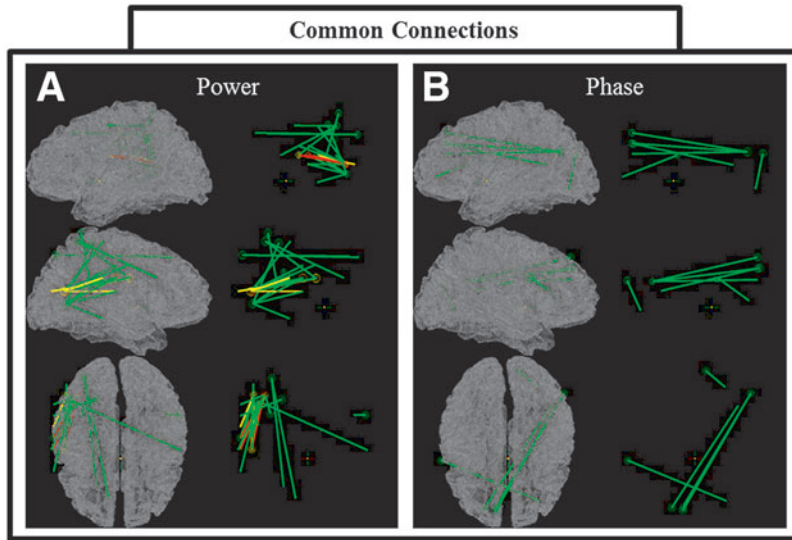

**SUPPLEMENTARY FIG. S4.** Common (directly overlapping) connections between (A) power and (B) phase-based measures. Green lines indicate two metrics share the connection in common, yellow indicate three, and red indicate four. Note that in (B) the maximum is two (green) since PLI shows no common connections with the other phase methods.
