# Supplementary material
Source: PubMed Central journal article supplement (PMC4533088)

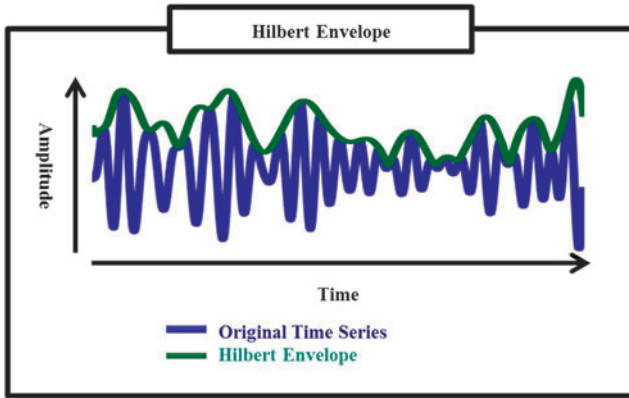

**SUPPLEMENTARY FIG. S2.** A visualization of the Hilbert envelope.

Supplement: Supp_Fig2.pdf [file Supp_Fig2.pdf]
